# Supplementary material for: Effect of Intraoperative Dexmedetomidine on Recovery of Gastrointestinal Function After Abdominal Surgery in Older Adults: A Randomized Clinical Trial
Source: PubMed Central journal article supplement — JAMA Netw Open. 2021 Oct 14;4(10):e2128886. doi: 10.1001/jamanetworkopen.2021.28886 (PMC8517746; doi:10.1001/jamanetworkopen.2021.28886), 2021-10-14
Supplement: jamanetwopen-e2128886-s002.pdf [file jamanetwopen-e2128886-s002.pdf]

## Supplementary Online Content

Lu Y, Fang PP, Yu YQ, et al; POGF Study Collaborators. Effect of intraoperative dexmedetomidine on recovery of gastrointestinal function after abdominal surgery in older adults: a randomized clinical trial. *JAMA Netw Open*. 2021;4(10):e2128886. doi:10.1001/jamanetworkopen.2021.28886

**eTable 1.** Baseline Characteristics of Patients Lost to Follow-up

**eTable 2.** Intraoperative Serious Events

**eFigure.** Assessment of Postoperative Pain, Sleep Quality, and Postoperative Nausea or Vomiting

This supplementary material has been provided by the authors to give readers additional information about their work.

**eTable 1.** Baseline Characteristics of Patients Lost to Follow-up

| Variable                   | Included (n=675) | Follow-up loss (n=133) | <i>t</i> / $\chi^2$ <sup>b</sup> | <i>P</i> value |
|----------------------------|------------------|------------------------|----------------------------------|----------------|
| Age, years                 | 70.23 ± 6.13     | 70.74 ± 6.38           | 0.884                            | .38            |
| Height, cm                 | 163.15 ± 13.18   | 163.83 ± 7.94          | 0.579                            | .56            |
| Weight, kg                 | 59.65 ± 9.50     | 60.96 ± 10.85          | 1.414                            | .16            |
| BMI                        | 22.17 ± 2.94     | 22.68 ± 3.54           | 1.552                            | .12            |
| Sex, No. (%)               |                  |                        | 0.003                            | .96            |
| Male                       | 445 (65.9)       | 88 (66.2)              |                                  |                |
| Female                     | 230 (34.1)       | 45 (33.8)              |                                  |                |
| Education level, No. (%)   |                  |                        | 0.986                            | .81            |
| Illiteracy                 | 242 (35.9)       | 51 (38.3)              |                                  |                |
| Primary                    | 342 (50.7)       | 62 (46.6)              |                                  |                |
| Secondary                  | 64 (9.5)         | 13 (9.8)               |                                  |                |
| High                       | 27 (4.0)         | 7 (5.3)                |                                  |                |
| ASA status, No. (%)        |                  |                        | 4.334                            | .12            |
| I                          | 30 (4.4)         | 3 (2.3)                |                                  |                |
| II                         | 464 (68.7)       | 103 (77.4)             |                                  |                |
| III                        | 181 (26.8)       | 27 (20.3)              |                                  |                |
| Method of surgery, No. (%) |                  |                        | 1.657                            | .20            |
| Laparoscopic               | 299 (44.3)       | 67 (50.4)              |                                  |                |
| Open                       | 396 (58.7)       | 66 (49.6)              |                                  |                |
| Site of surgery, No. (%)   |                  |                        | 2.333                            | .31            |
| Gastric                    | 283 (41.9)       | 56 (42.1)              |                                  |                |
| Intestinal                 | 202 (29.9)       | 47 (35.3)              |                                  |                |
| Others <sup>a</sup>        | 190 (28.1)       | 30 (22.6)              |                                  |                |

Data were presented as mean ± SD or No. (frequency).

Abbreviations: BMI, body mass index (calculated as weight in kilograms divided by height in meters squared); ASA, American Society of Anesthesiologists

<sup>a</sup>Others mean the site of surgery may be liver, gallbladder, pancreas and appendix.

<sup>b</sup>The values that appear in the fourth column were t or  $\chi^2$ .

**eTable 2.** Intraoperative Serious Events

| Variable                       | DEX (n=344) | CON (n=331) | $\chi^2$ | P value |
|--------------------------------|-------------|-------------|----------|---------|
| Bradycardia, No. (%)           |             |             |          |         |
| Treatment                      | 22 (6.4)    | 12 (3.6)    | 3.744    | .05     |
| Not required treatment         | 28 (8.1)    | 20 (6.0)    |          |         |
| Hypotension, No. (%)           |             |             |          |         |
| Treatment                      | 30 (8.7)    | 45 (13.6)   | 0.998    | .32     |
| Not required treatment         | 65 (18.9)   | 58 (17.5)   |          |         |
| Hypertension, No. (%)          |             |             |          |         |
| Treatment                      | 14 (4.1)    | 15 (4.5)    | 1.178    | .28     |
| Not required treatment         | 30 (8.7)    | 37 (11.2)   |          |         |
| Stroke, No. (%)                | 0 (0.0)     | 0 (0.0)     | —        | —       |
| Myocardial infarction, No. (%) | 0 (0.0)     | 0 (0.0)     | —        | —       |
| Heart failure, No.(%)          | 0 (0.0)     | 0 (0.0)     | —        | —       |

Data were presented as No.(frequency).

Abbreviations: DEX, dexmedetomidine; CON, control.

**eFigure.** Assessment of Postoperative Pain, Sleep Quality, and Postoperative Nausea or Vomiting

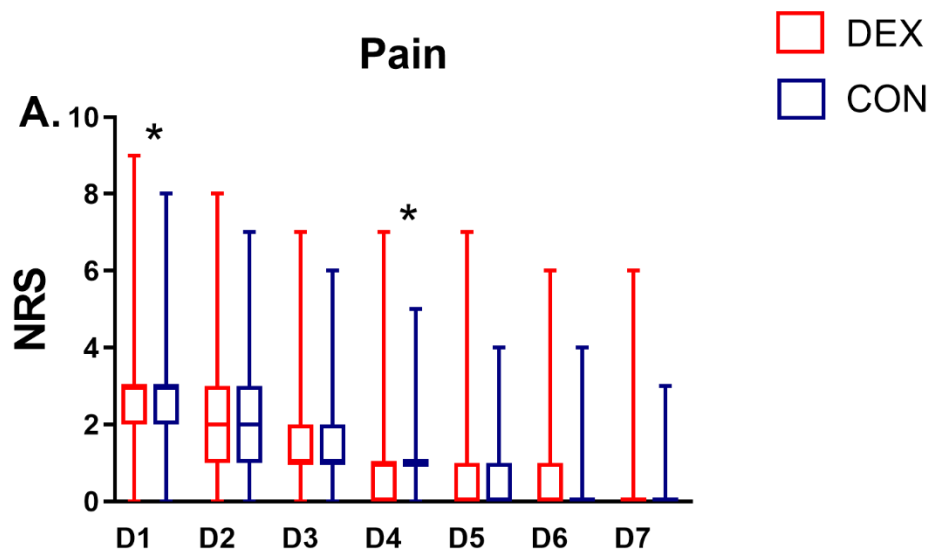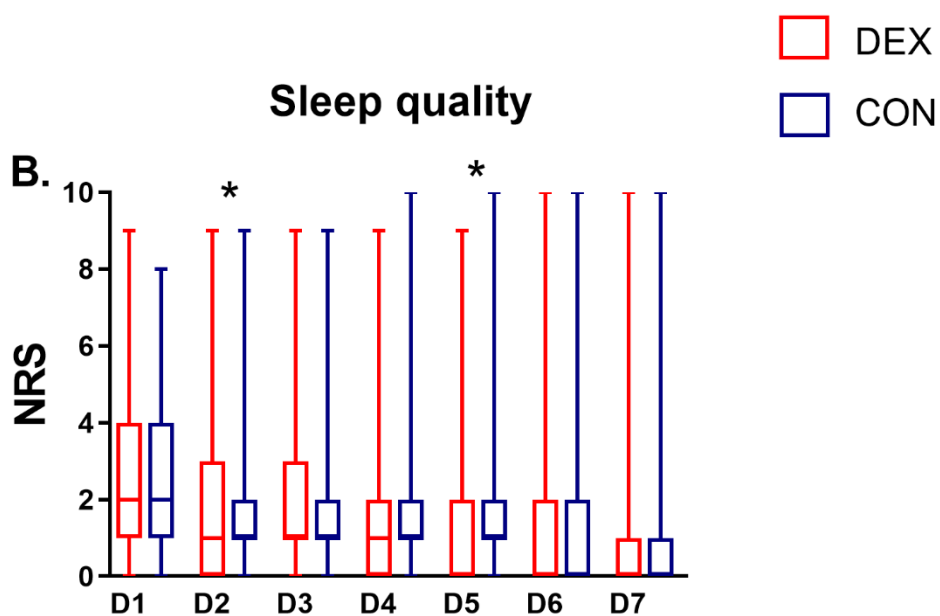

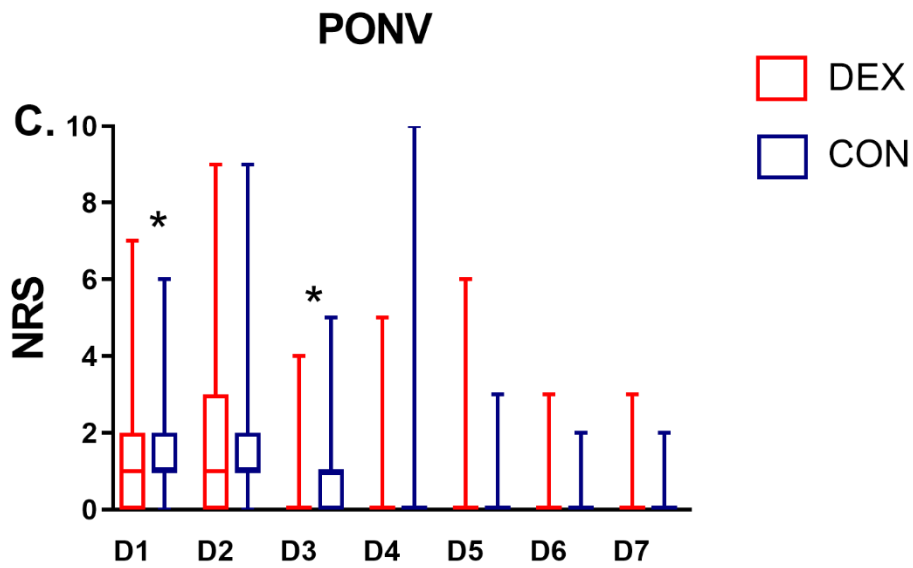

**A:** Pain; **B:** Sleep quality; **C:** PONV. All the scores are reported on a scale from 0 (best) to 10 (worst). Group DEX, patients were received dexmedetomidine 0.5 ug/kg for 15 min, and then changed to 0.2 ug/kg/h for continuous pumping until 30 min before the end of operation. Group CON, patients were received equal volume saline with same pattern as group DEX. PONV, postoperative nausea and vomiting; NRS, numeric rating scale. \* P < 0.05 compared with Group CON.
