# Supplementary material for: Effect of Intraoperative Dexmedetomidine on Recovery of Gastrointestinal Function After Abdominal Surgery in Older Adults: A Randomized Clinical Trial
Source: PubMed Central journal article supplement — JAMA Netw Open. 2021 Oct 14;4(10):e2128886. doi: 10.1001/jamanetworkopen.2021.28886 (PMC8517746; doi:10.1001/jamanetworkopen.2021.28886), 2021-10-14
Supplement: jamanetwopen-e2128886-s004.pdf [file jamanetwopen-e2128886-s004.pdf]

## Data Sharing Statement

Lu. Effect of Intraoperative Dexmedetomidine on Recovery of Gastrointestinal Function After Abdominal Surgery in Older Adults. *JAMA Netw Open*. Published October 14, 2021.  
doi:10.1001/jamanetworkopen.2021.28886

### Data

**Data available:** Yes

**Data types:** Deidentified participant data

**How to access data:** [liuxuesheng@ahmu.edu.cn](mailto:liuxuesheng@ahmu.edu.cn)

**When available:** With publication

### Supporting Documents

**Document types:** Statistical/analytic code

**How to access documents:** [liuxuesheng@ahmu.edu.cn](mailto:liuxuesheng@ahmu.edu.cn)

**When available:** With publication

### Additional Information

**Who can access the data:** researchers whose proposed use of the data has been approved

**Types of analyses:** for a specified purpose

**Mechanisms of data availability:** with a signed data access agreement

**Any additional restrictions:** no
